# Supplementary material
Source: Springer Nature journal article supplement (https://www.springermedizin.de/resource/supplementary/12936_2014_3633_MOESM7_ESM.pdf/9546128)

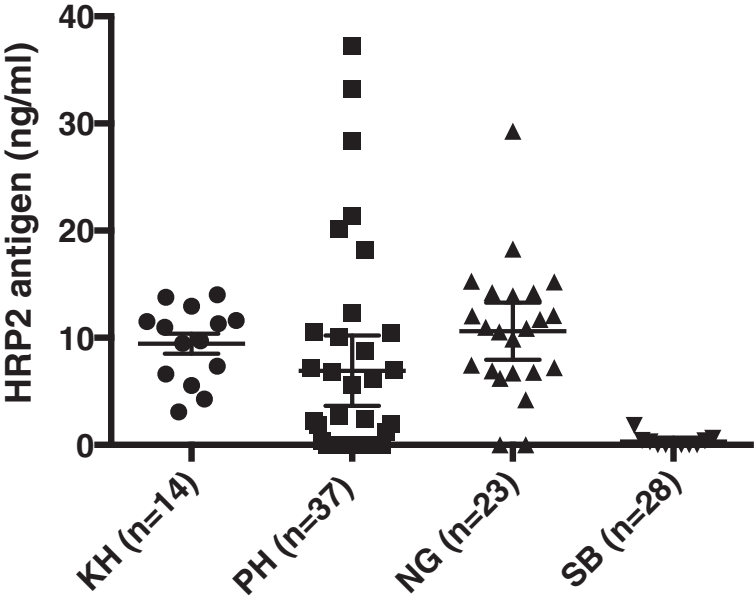

Supplement: MOESM7 [file 9546128]
